# Supplementary material for: Predation by Bears Drives Senescence in Natural Populations of Salmon
Source: PubMed Central journal article supplement (PMC3280632; doi:10.1371/journal.pone.0001286), 2007-12-12
Supplement: pone.0001286.s003.pdf [file pone.0001286.s003.pdf]

**Table S2.**

| Population | Model V  |           |          | Model VI |           |          |
|------------|----------|-----------|----------|----------|-----------|----------|
|            | $\alpha$ | $\lambda$ | $\omega$ | $\alpha$ | $\lambda$ | $\omega$ |
| A          | 4.717    | 2.66E-06  | 0.106    | 4.61     | 3.54E-06  | 0.107    |
| Bear       | 4.383    | 2.66E-06  | 0.092    | 4.61     | 1.45E-06  | 0.091    |
| C          | 4.445    | 2.66E-06  | 0.095    | 4.61     | 1.7E-06   | 0.094    |
| Hansen     | 5.062    | 2.66E-06  | 0.120    | 4.61     | 8.75E-06  | 0.125    |
| Pick       | 4.220    | 2.66E-06  | 0.085    | 4.61     | 7.99E-07  | 0.082    |
| Yako       | 4.710    | 2.66E-06  | 0.106    | 4.61     | 3.37E-06  | 0.106    |
